# Supplementary material for: Antibacterial and Antifungal Properties of a Novel Antimicrobial Peptide GK-19 and Its Application in Skin and Soft Tissue Infections Induced by MRSA or Candida albicans
Source: MDPI journal article supplement (doi:10.3390/pharmaceutics14091937), 2022-09-13
Supplement: s1 [file s1]

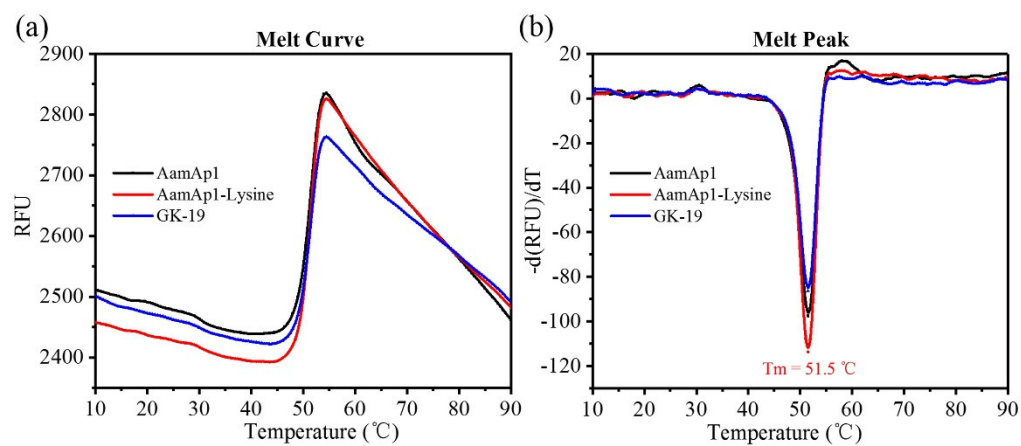

**Figure S1** (a) Melt curve of AamAP1, Aamap1-Lys and GK-19. (b) Melt peak of AamAP1, Aamap1-Lys and GK-19.

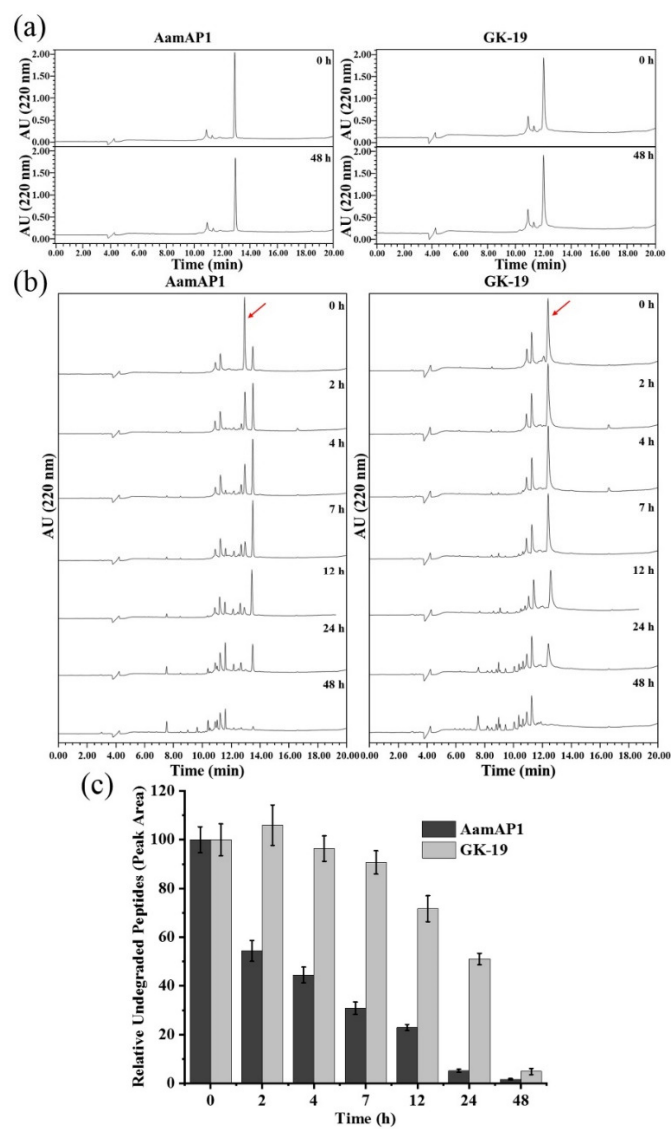

**Figure S2** Stability of AamAP1 and GK-19 in water and rat serum. (a) The HPLC peaks of AamAP1 and GK-19 after incubation in water at 37 °C, 200 rpm for 0 and 48 h. (b,c) The HPLC peaks of AamAP1 and GK-19 after incubation in rat serum at 37 °C, 200 rpm for different times and quantitative analysis of undegraded peptides with peak area.

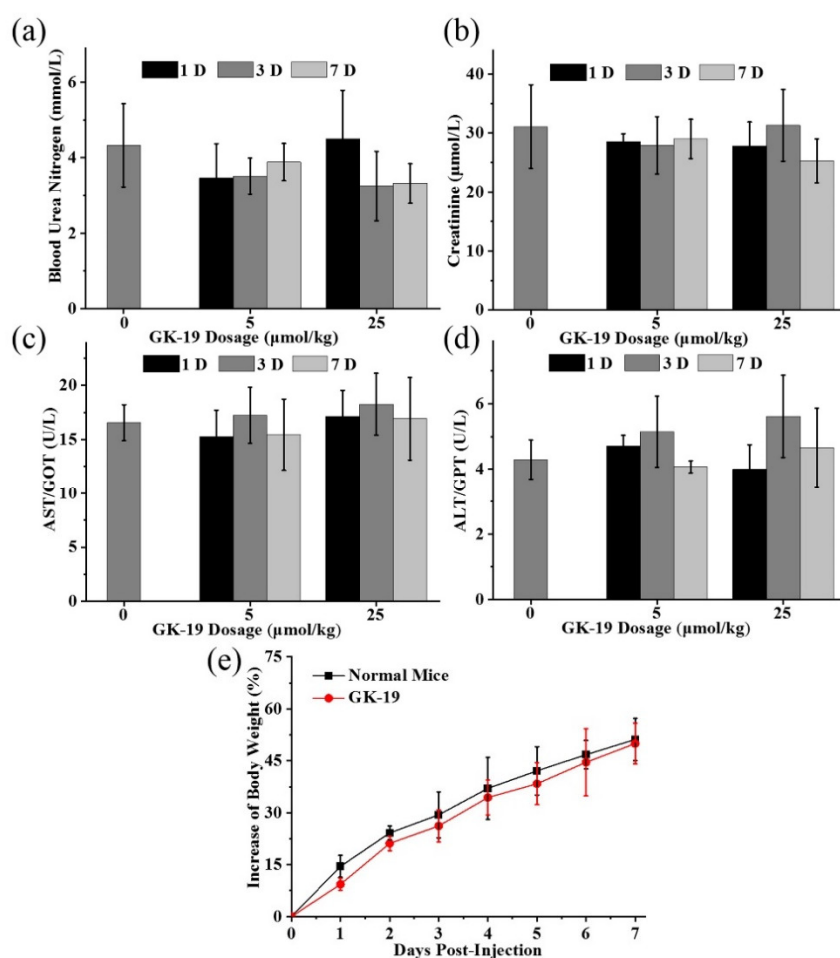

**Figure S3** *In vivo* toxicity of GK-19. Renal function test (a,b) and liver function test (c,d) of the mice treated with saline solution or GK-19 (5 and 25  $\mu\text{mol/kg}$ ). (e) Body weight changes in mice over 7 days after being injected with 25  $\mu\text{mol/kg}$  of GK-19 (n = 5).

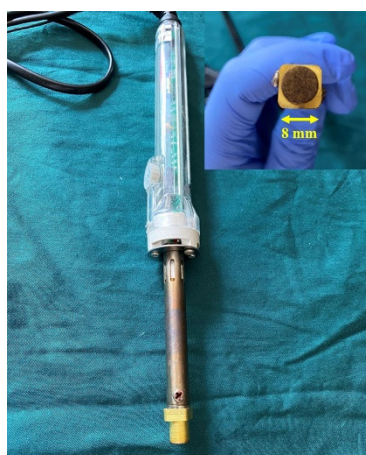

**Figure S4** Custom-made circular iron (diameter: 8 mm) for scalded mouse models combined with SSTIs.

**Table S1** Minimum inhibitory concentration (MIC) of AamAP1, AamAP1-Lys and GK-19 against five bacteria and three fungi.

| Peptide<br>MIC (μM)  | AamAP1 | AamAP1-Lysine | GK-19 |
|----------------------|--------|---------------|-------|
| <i>E. Coli</i>       | > 20   | 5             | 3     |
| <i>K. Pneumoniae</i> | > 20   | 5             | 5     |
| <i>P. Aeruginosa</i> | > 20   | 10            | 5     |
| <i>E. Faecalis</i>   | > 20   | 5             | 3     |
| <i>MRSA</i>          | > 20   | 5             | 5     |
| <i>C. Krusei</i>     | 20     | 5             | 5     |
| <i>C. Albicans</i>   | > 20   | 10            | 10    |
| <i>C. Glabrata</i>   | > 20   | 10            | 10    |
